# Supplementary material for: Exploring the temperature-dependent kinetics and thermodynamics of immobilized glucose oxidase in microchip
Source: Royal Society of Chemistry journal article supplement (doi:10.1039/c2ay25477h), 2012-01-01
Supplement: c2ay25477h.pdf [file c2ay25477h.pdf]

## Supporting Information for

### Exploring the Temperature-Dependent Kinetics and Thermodynamics of Immobilized Glucose Oxidase in Microchip

*Lu Chen, Zeng-Qiang Wu, Chen Wang, Jun Ouyang, Xing-Hua Xia\**

State Key Laboratory of Analytical Chemistry for Life Science, School of Chemistry  
and Chemical Engineering, Nanjing University, Nanjing 210093, China

\*Corresponding author. E-mail: [xhxia@nju.edu.cn](mailto:xhxia@nju.edu.cn) (X. H. Xia)

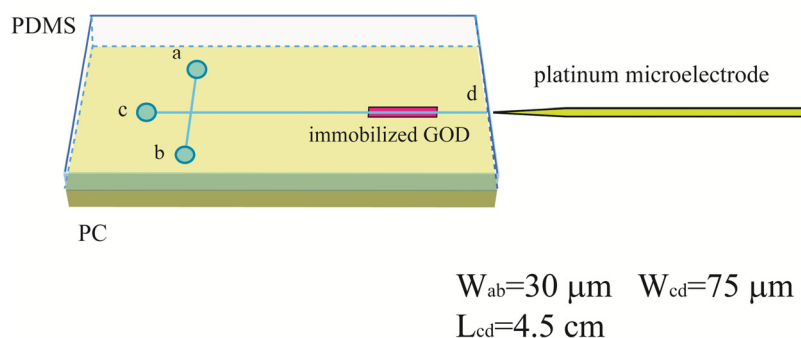

**Figure S1.** Schematic layout of the microchip. (a) Glucose reservoir; (b, c) buffer reservoirs; (d) end-channel electrochemical detection point.

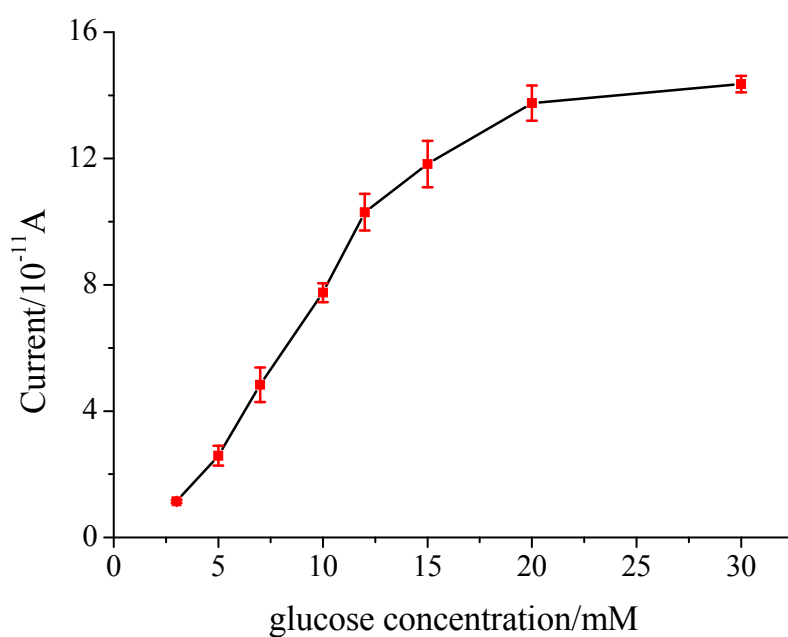

**Figure S2.** Electrochemical response as a function of substrate concentration (dissolved in 5 mM PBS (pH 7.4)) in the microreactor with immobilized GOD at 306.15 K.
